# Supplementary material
Source: MDPI journal article supplement (https://www.mdpi.com/2673-9976/19/1/7)
Supplement: s1 [file s1 › blsf-2052043-supplementary.pdf]

## INTRODUCTION

Covid-19 has become a global concern. Many risk factors have been identified. Down syndrome which is 21 trisomy affects the mental and physical health of the patient. Where less data is available regarding the association of COVID with down syndrome/

## OBJECTIVE

The objective of this systematic review is to focus on different evidence available related to the association of COVOD with down syndrome.

## Discussion

Down syndrome leads to severe immune dysregulation. Scientists are investigating the exact mechanism behind the dysregulation of the immune system caused by trisomy 21 or down syndrome but still, the research on it is going on. In DS, chromosome 21 activates multiple genes which cause hyperactivity of the immune system. Chromosome 21 encodes the following immune regulators: interferon (IFN) receptors, (IL)-10, IL-22, and IL-26. Immune and non-immune cells are sensitive to IFN and many studies report that in the absence of any infection there is still hyperactivity of T cells due to TFN in DS patients. IFN response which is involved in the antiviral response is vigorous in DS patient and lead to cytokine storm. Recent studies showed that COVID infections are driven by an exacerbated immune response to the virus, leading to cytokine storm, acute respiratory distress syndrome, thromboembolic processes, and multi-organ failure.

## Material and methods

PubMed/Medline, Science Direct, Web of Science, and Scopus databases were used to find the research done related to the association of COVID with down syndrome up to 2022.

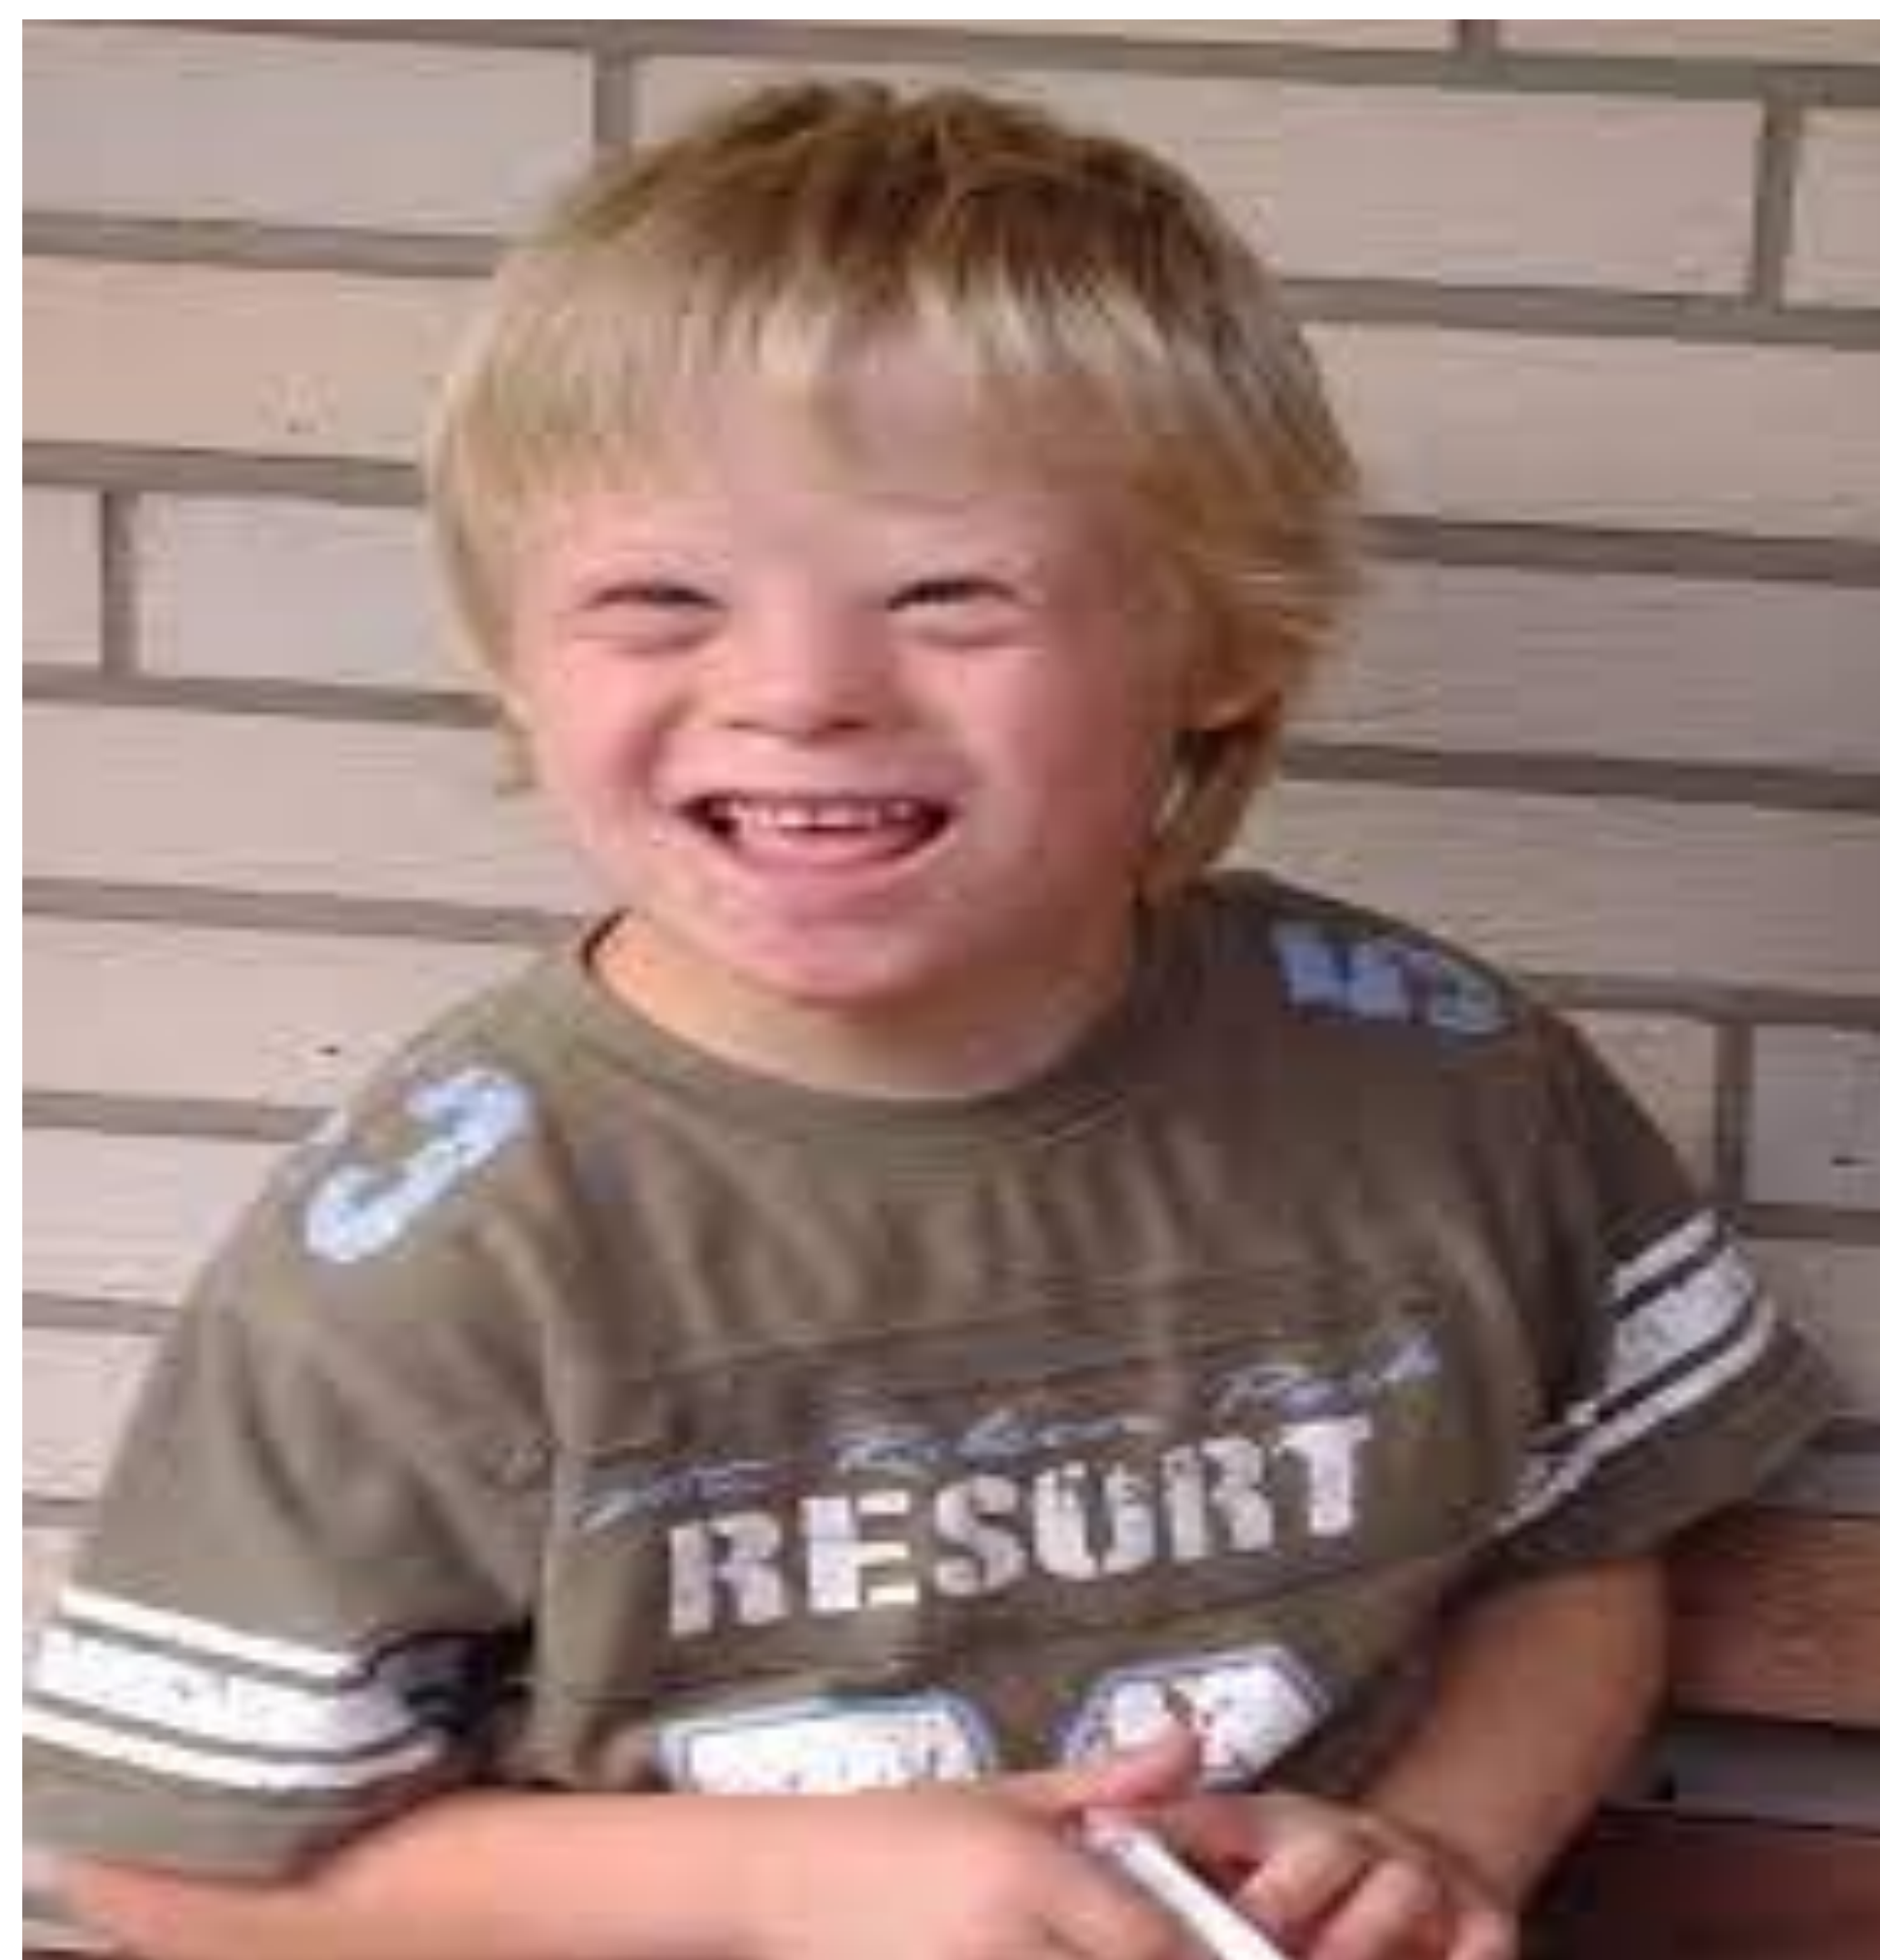

## Results

All studies showed that COVID-19 was more severe in DS patients as compared with non-DS patients and lead to complications like severe pneumonia and severe respiratory distress syndrome. All studies showed that Severe COVID-19 symptoms like fever, cough, nasal congestion and shortness of breath were more common in DS patients than non-DS patients except Malle L et al which did not mention anything about the occurrence of COVID symptoms in DS patients.

## Conclusion

All studies showed that Down syndrome is associated with severe COVID and can lead to hospitalization and complications. Adults and children with COVID and down syndrome are more vulnerable and should be prioritized for vaccination

## References

1. Faundes V, Pardo R, Cammarata-Scalisi F, Alarcon P, Lay-Son G, San Martin E. Consenso de la Rama de Genética de la Sociedad Chilena de Pediatría sobre priorización de personas con Síndrome de Down y otras condiciones poco frecuentes en la Campaña de Vacunación COVID-19 [Consensus of the Genetics Branch of the Chilean Society of Pediatrics on the prioritization of people with Down syndrome and rare diseases for vaccination against SARS-CoV-2]. Andes Pediatr. 2021 Apr;92(2):309-315. Spanish. doi: 10.32641/andespediatr.v92i2.3716. PMID: 34106172.
2. Vita S, Di Bari V, Corpolongo A, Goletti D, Espinosa J, Petracca S, Palmieri F, Nicastrì E; INMI COVID-19 study groups. Down Syndrome patients with COVID-19 pneumonia: A high-risk category for unfavourable outcome. Int J Infect Dis. 2021 Feb;103:607-610. doi: 10.1016/j.ijid.2020.11.188. Epub 2020 Nov 30. PMID: 33271290; PMCID: PMC7703224.
